# Supplementary material
Source: publisher figshare collection journal article supplement (https://geolsoc.figshare.com/ndownloader/files/28692039)
Supplement: Supplementary file 1 [file 28692039]

## Sheet: List1
Supplementary material 1. Published whole-rock data for studied orangeite and lamprophyre samples from the Eastern Dharwar and Bastar Craton, India
Sample	Loaction	SiO2	TiO2	Al2O3	Fe2O3	MnO	MgO	CaO	Na2O	K2O	P2O5	LOI	Total	Sc	V	Cr	Co	Ni	Cu	Zn	Ga	Rb	Sr	Y	Zr	Nb	Ba	La	Ce	Pr	Nd	Sm	Eu	Gd	Tb	Dy	Ho	Er	Tm	Yb	Lu	Hf	Ta	Pb	Th	U
KDK-2	Kodomali	47.34	1.29	6.57	7.58	0.11	22.13	8	0.89	1.6	1.6	3.81	100.92	16.89	138.75	2487.6	72.88	1131.2	48.39	110.99	12.97	81.47	683.58	15.39	264.81	94.1	2325.3	94.22	159.46	18.8	66.77	9.77	3.42	10.47	0.97	3.26	0.6	1.63	0.19	0.96	0.15	4.67	1.11	7.66	8.25	1.35
PP/MUD 1/1	Mudigubba	53.94	0.66	9.7	7.49	0.13	10.19	12.49	2.52	1.09	0.17	1.64	100.03	50	184	380	38	140	30	70	14	28	479	15	78	3	353	21.7	49.7	7.01	32.3	7.1	1.89	4.9	0.6	3.1	0.6	1.5	0.2	1.3	0.19	2	0.1	5	2.3	0.6
PP/MUD 2/1	Mudigubba	52.72	0.76	9.14	8.47	0.18	11.15	12	2.21	1.13	0.37	1.58	99.71	54	195	420	46	170	20	90	13	26	354	16	74	3	439	26.2	59	8.48	38.7	8.9	2.4	6.1	0.8	3.9	0.7	1.8	0.24	1.5	0.22	2.1	0.1	5	2.5	0.6
PP/MUD 3/1	Mudigubba	52.44	0.69	7.75	7.66	0.14	11.64	13.87	2.12	0.78	0.21	1.95	99.25	55	190	500	44	200	30	80	12	19	327	17	78	3	274	24.6	55.3	7.83	36.2	8.4	2.18	5.3	0.7	3.7	0.6	1.7	0.21	1.2	0.19	2	0.1	5	2.6	0.7
PP/MUD 3/2	Mudigubba	51.87	0.63	8.34	7.78	0.14	11.11	14.32	2.22	0.7	0.19	2.1	99.4	53	184	470	40	170	20	70	11	12	371	14	59	2	282	20.5	48.3	6.53	30.2	6.7	1.87	5.2	0.7	3.3	0.6	1.5	0.19	1.2	0.17	1.5	0.1	5	2.1	0.5
PP/MUD 6/1	Mudigubba	51.77	0.69	7.75	8.12	0.16	12.33	14.76	2.07	0.67	0.14	1.03	99.49	63	198	830	43	220	40	70	11	13	288	16	72	3	237	18.2	43.6	5.91	27.4	6.2	1.75	5.2	0.7	3.6	0.6	1.7	0.22	1.4	0.18	1.6	0.1	5	2.3	0.6
PP/MUD 6/2	Mudigubba	52.78	0.65	7.94	7.7	0.14	11.8	14.47	2.27	0.79	0.18	0.86	99.59	59	187	820	42	230	30	70	10	15	276	15	74	2	279	18.5	44.2	6.05	27.8	6.3	1.76	5.1	0.7	3.6	0.6	1.7	0.23	1.3	0.19	1.7	0.1	5	2.3	0.5
PP/MUD 7/1	Mudigubba	53.79	0.66	8.32	7.6	0.14	11.13	13.86	2.14	0.63	0.14	1.15	99.56	56	180	680	37	200	30	70	12	17	382	17	77	2	186	19.9	45.9	6.66	29.4	6.7	1.76	5	0.7	3.5	0.6	1.7	0.23	1.4	0.21	2.1	0.1	5	3.2	0.5
OP 2012/1	Mudigubba	51.67	0.68	7.19	8.43	0.16	12.51	15.92	1.84	0.49	0.21	1.53	100.63	64	206	760	42	240	30	70	10	10	306	16	59	2	204	16.5	40.9	5.76	27	6.3	1.72	5	0.7	3.7	0.6	1.7	0.22	1.3	0.18	1.5	0.1	5	1.5	0.3
N/KAD/1	Kadiri	57.3	0.56	14.24	7.58	0.12	6.24	6.57	3.17	1.99	0.23		98	24	130	216	24	90	22	151	14	45	469	13	106	4	399	25.8	51.5	6.1	23.3	4.3	1.8	4.1	0.5	2.5	0.5	1.4	0.2	1.2	0.2	2.8	0.2	6.2	-	-
N/KAD2/2	Kadiri	55.56	0.79	13.81	8.95	0.16	6.92	7.99	2.47	1.89	0.25	1.52	100.3	25	199	350	35	70	80	90	16	80	548	15	92	4	532	21.6	46.1	5.4	21.3	4.4	1.29	3.9	0.6	3	0.6	1.7	0.25	1.6	0.24	2.6	0.3	7	3.8	0.8
N/KAD/3	Kadiri	57.27	0.59	14.67	7.58	0.14	5.48	6.61	3.17	2.05	0.21	1.86	99.64	21	145	220	29	80	40	80	17	60	649	12	103	5	557	31	61.6	7	27.1	4.8	1.29	3.7	0.5	2.7	0.5	1.4	0.2	1.3	0.19	2.6	0.4	9	7.1	1.7
PP/KAD1/1	Kadiri	53.71	0.9	12.24	10.32	0.17	8.35	8.6	2.49	1.31	0.28	1.52	99.9	30	229	430	41	110	70	100	16	42	384	16	95	4	577	21.4	45.8	5.67	22.9	5	1.35	4.5	0.6	3.3	0.7	1.9	0.27	1.7	0.27	2.5	0.3	5	3.7	0.8
PP/KAD3/1	Kadiri	54.39	0.77	12.81	9.47	0.15	7.94	8.74	2.1	1.6	0.23	1.46	99.67	28	206	410	37	80	70	100	15	70	490	15	97	4	401	16.3	37.2	4.65	19.4	4.3	1.16	3.6	0.5	2.9	0.6	1.7	0.25	1.6	0.25	2.4	0.3	5	3.2	0.7
PP/KAD3/2	Kadiri	54.09	0.75	12.25	9.66	0.17	8.73	8.69	1.83	2.16	0.26	1.68	100.3	29	193	590	39	100	10	120	15	93	462	15	96	4	539	20.4	41.8	5.28	20.7	4.4	1.31	3.9	0.5	3.1	0.6	1.6	0.24	1.5	0.23	2.6	0.3	7	3.5	0.8
PP/U1/1	Udiripikonda	44.4	2.45	14.34	11.84	0.17	7.64	8.1	2.24	4.62	0.67	2.38	98.85	15	148	190	36	170	80	100	15	94	1395	24	233	68	1037	98.8	196	21.8	76.9	11.4	3.14	8.3	1.1	5.4	0.9	2.3	0.3	1.7	0.25	5	3.3	8	3.4	0.8
PP/U1/2	Udiripikonda	43.21	2.41	14.39	11.44	0.18	6.88	8.6	2.8	4.17	0.69	3.6	98.37	14	143	110	35	130	80	550	15	97	1512	25	238	69	1017	109	210	23.2	80.6	11.8	3.3	8.7	1.1	5.6	1	2.4	0.29	1.7	0.25	5.2	3.4	167	3.6	0.8
PP/U1/3	Udiripikonda	44.46	2.4	13.96	11.39	0.17	7.7	8.74	1.5	5.09	0.66	2.53	98.6	15	145	140	47	170	60	100	18	159	1447	23	242	69	1094	106	207	24	86.4	13	3.64	8.7	1.1	5.7	1	2.7	0.34	2	0.29	4.8	3.5	5	3.5	0.7
AKL LL1	Udiripikonda	44.05	2.47	14.08	11.26	0.17	8.23	9.09	2.49	4.36	0.68	2.5	99.38	18	156	130	46.8	127	52	59	18.5	103.4	1505.3	27.5	238.3	64.6	884	99.5	191.3	22.71	84.9	12.03	3.41	9.57	1.2	6.36	1.01	2.58	0.31	1.99	0.28	5.1	3	3.8	3.7	0.8
UK/2012/1	Udiripikonda	45.1	2.38	14.19	11.27	0.17	7.43	8.81	2.1	4.73	0.67	2.37	99.22	17	158	150	31	110	40	80	15	124	1471	25	244	65	861	101	201	22.5	79.7	11.9	3.36	8.8	1.2	5.8	1	2.6	0.31	1.7	0.26	5.2	3.3	7	3.3	0.7
UK/2012/2	Udiripikonda	45.41	2.28	13.36	11.24	0.16	7.98	9.04	1.71	4.77	0.63	1.88	98.46	18	152	260	47	200	70	110	18	137	1602	23	236	63	932	93.6	185	21.5	78.6	12.1	3.39	7.9	1.1	5.5	1	2.5	0.32	1.9	0.29	5	3.2	5	3.1	0.7
Explanations: LOI - The loss on ignition
References:
KDK-2: Chalapathi Rao et al. (2013c)
Mudigubba lamprophyres: Pandey et al. (2017b; 2020)
Kadiri lamprophyres: Pandey et al. (2018)
Udiripikonda lamprophyre: Pandey et al. (2017a)
